# Supplementary material for: Ethno-medicinal and bio-cultural importance of aloes from south and east of the Great Rift Valley floristic regions of Ethiopia
Source: PubMed Central journal article supplement — Heliyon. 2020 Jun 29;6(6):e04344. doi: 10.1016/j.heliyon.2020.e04344 (PMC7330614; doi:10.1016/j.heliyon.2020.e04344), 2020-06-29
Supplement: mmc1.pdf [file mmc1.pdf]

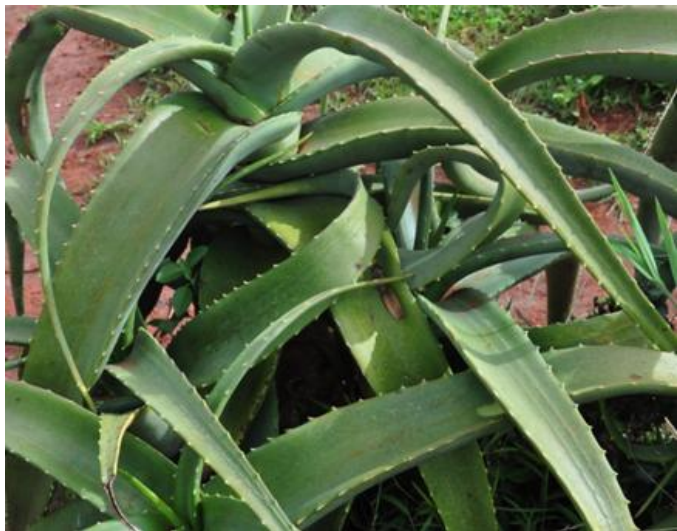

*Aloe calidophila*

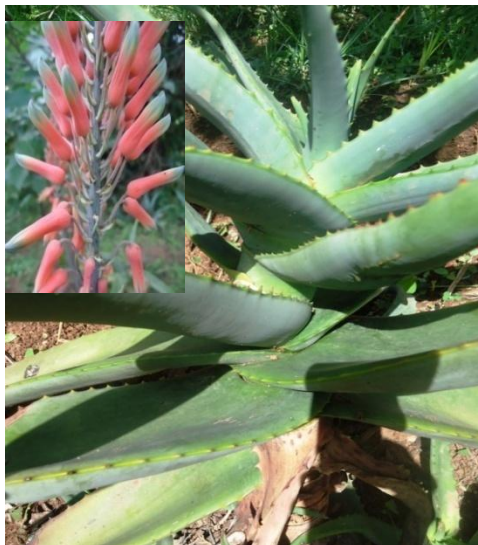

*A. megalacantha* subs. *alticola*

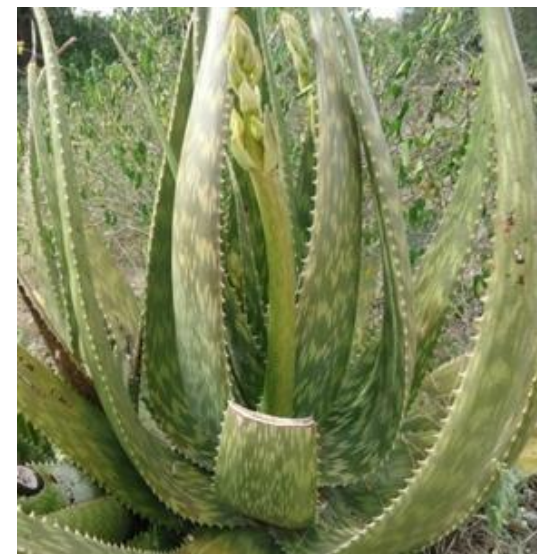

*A. pirottae*

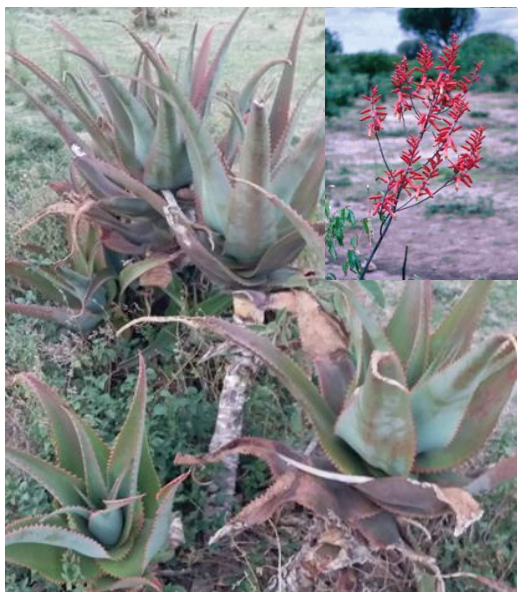

*A. gilbertii* subsp. *gilbertii*

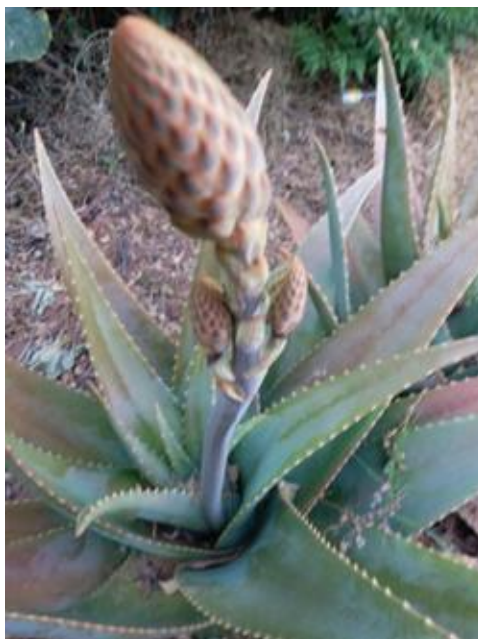

*A. pubescens*

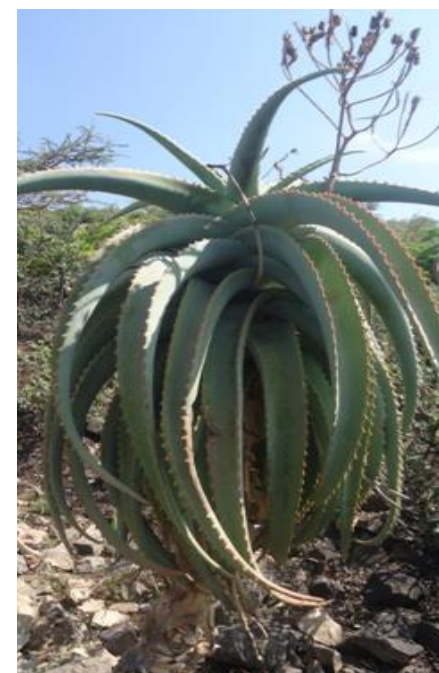

*A. megalacantha* subsp. *megalacantha*

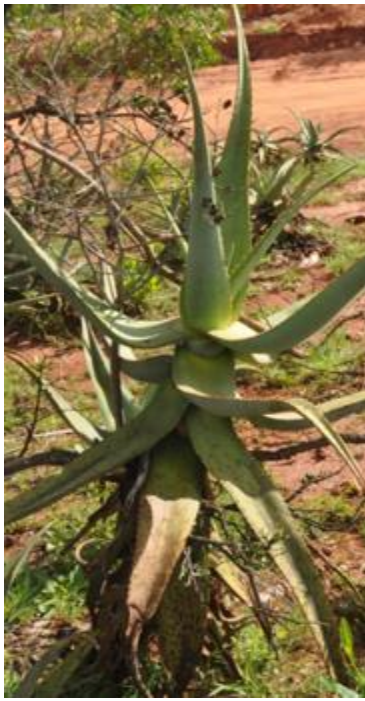

*A. yavellana*

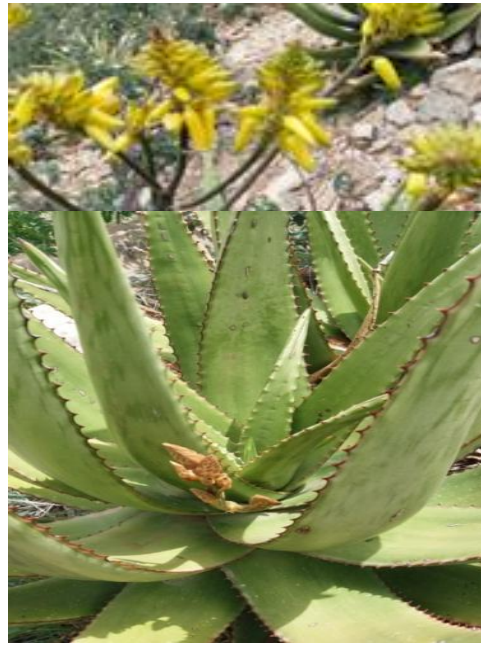

*A. harlana*

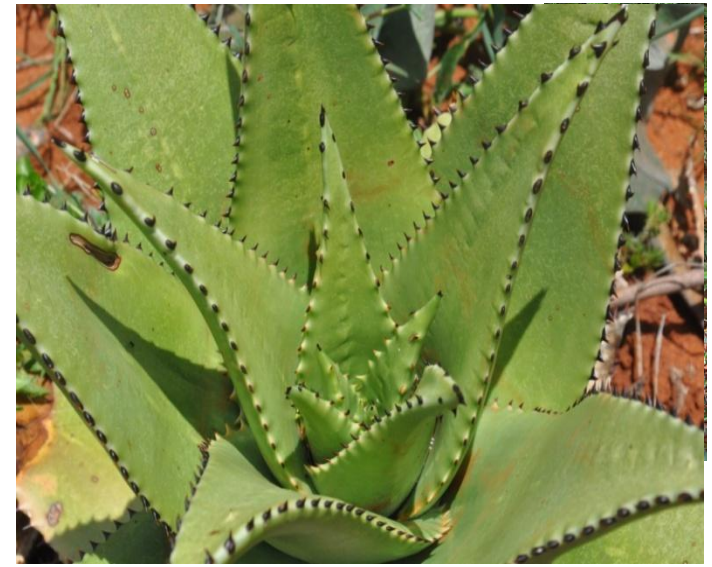

*A. secundiflora*

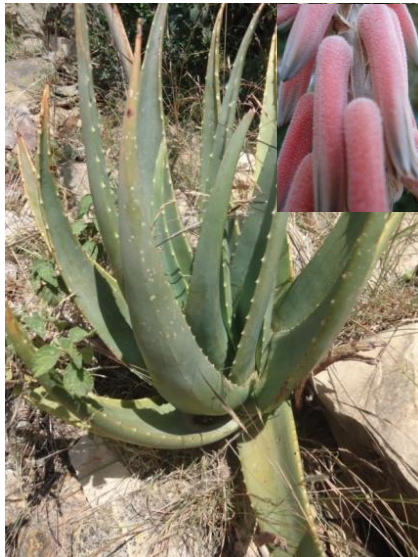

*A. trichosantha* subsp. *longiflora*

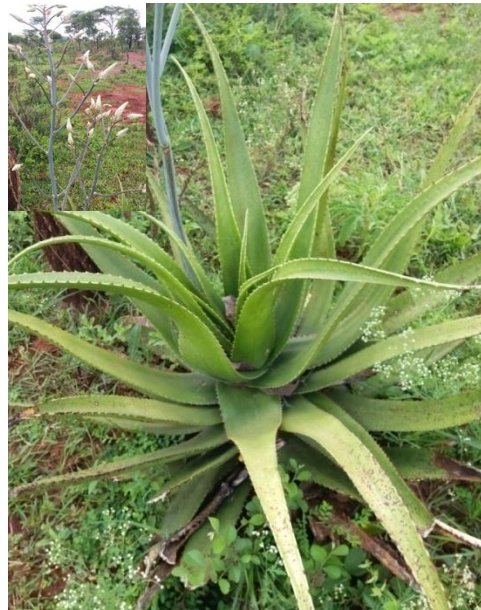

*A. otallensis*

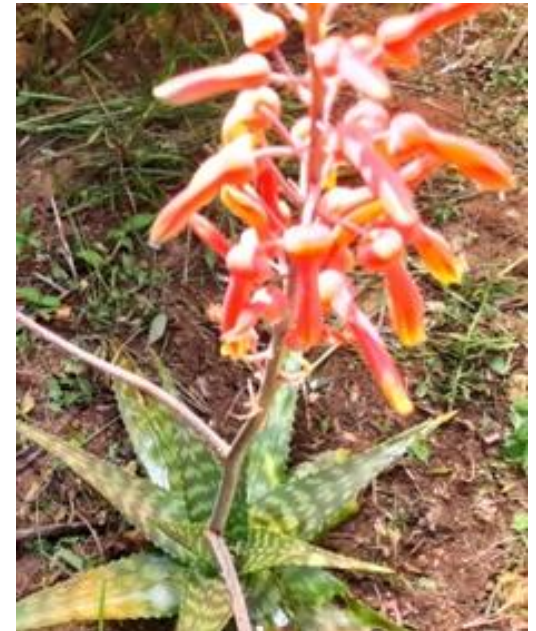

*A. macrocarpa*

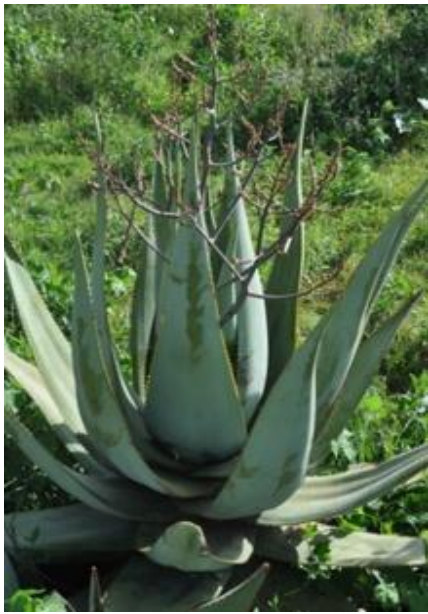

*A. rivaie*

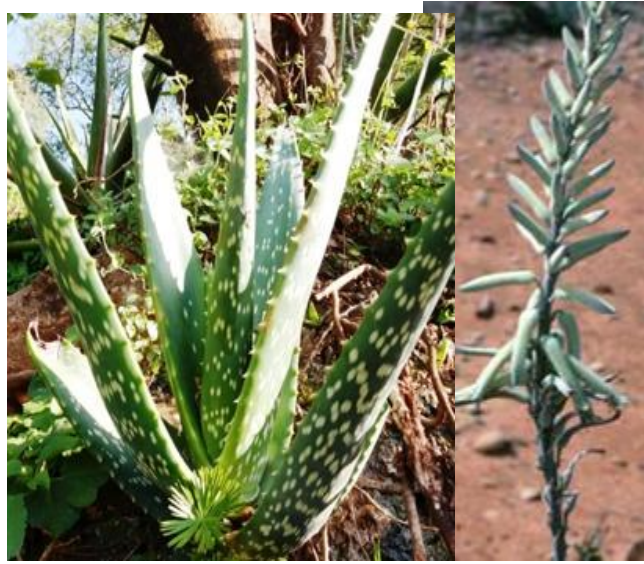

*A. citrina*

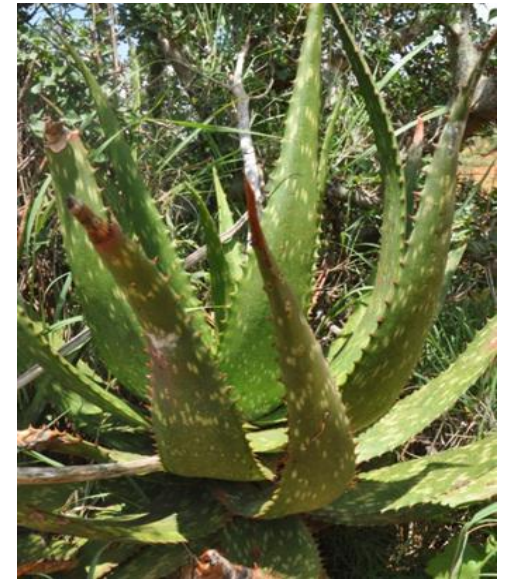

*A. rugosifolia*

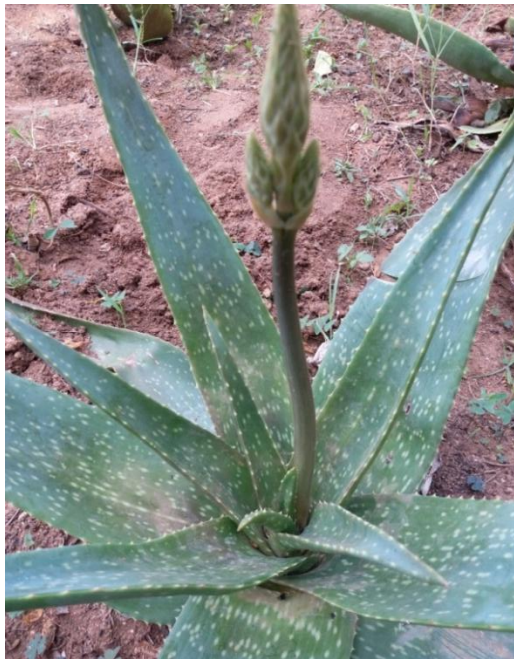

Unidentified-AHU51

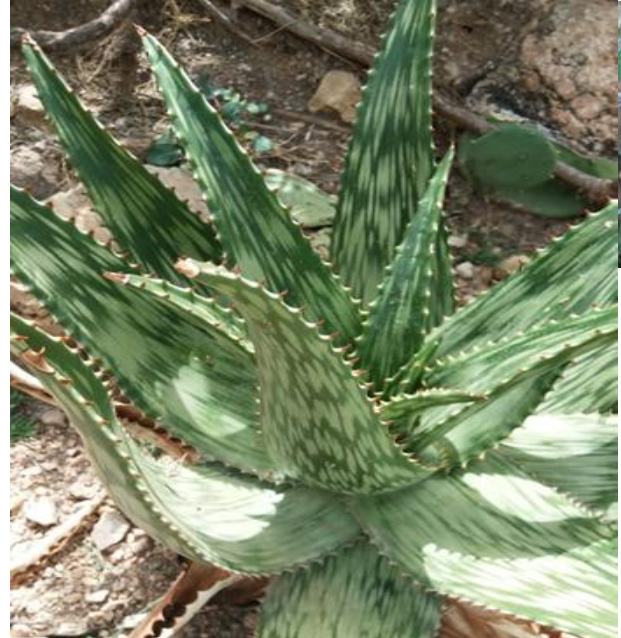

Unidentified-AHU53

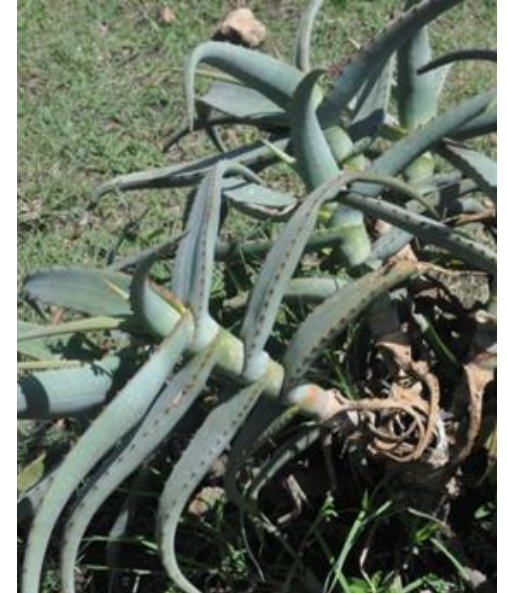

*A. tewoldei*

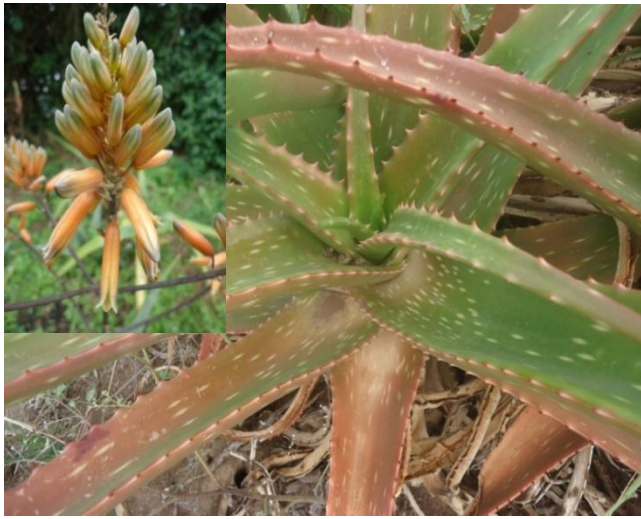

*A. mcloughlinii*

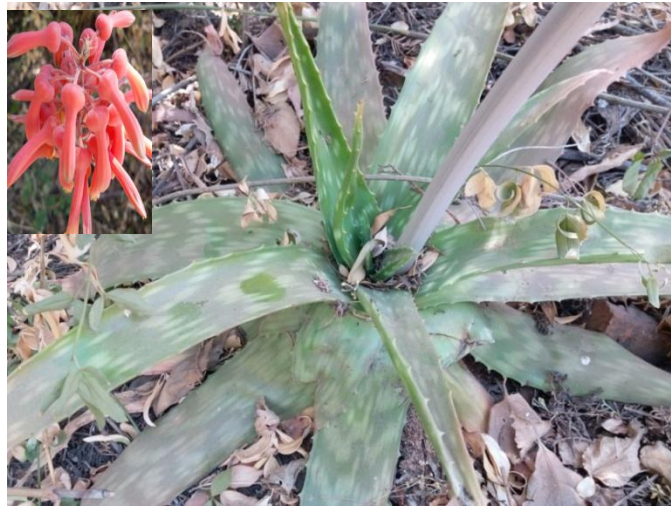

*A. lateritia*

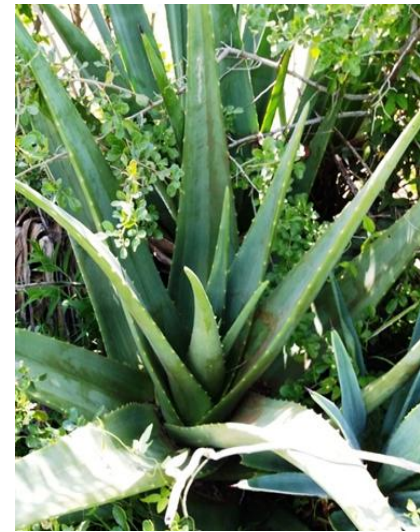

*A. welmelensis*

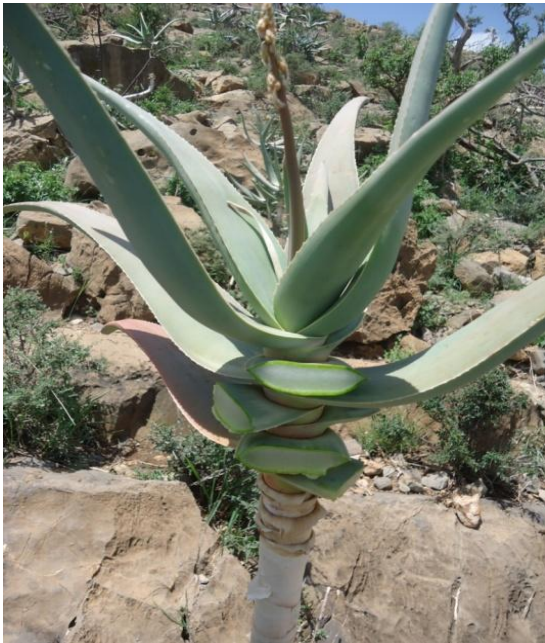

*A. retrospiciens*

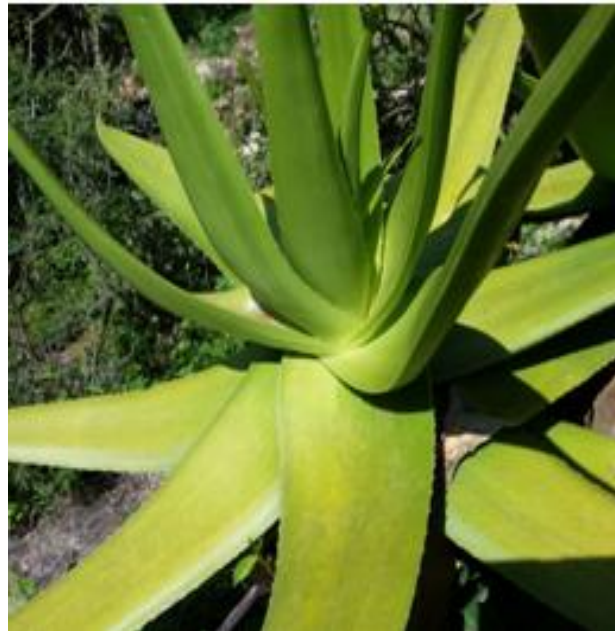

*A. ruspoliana*
